# Supplementary material for: Blood vessels guide Schwann cell migration in the adult demyelinated CNS through Eph/ephrin signaling
Source: Springer Nature journal article supplement (doi:10.1007/s00401-019-02011-1), 2019-04-22

Suppl. Fig. 1

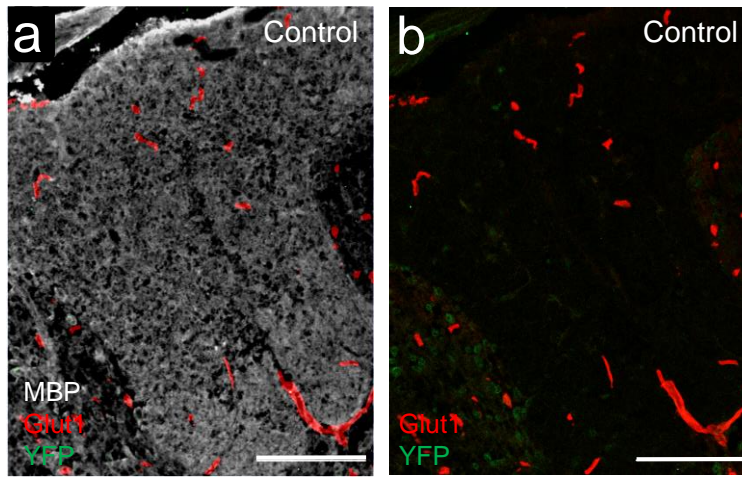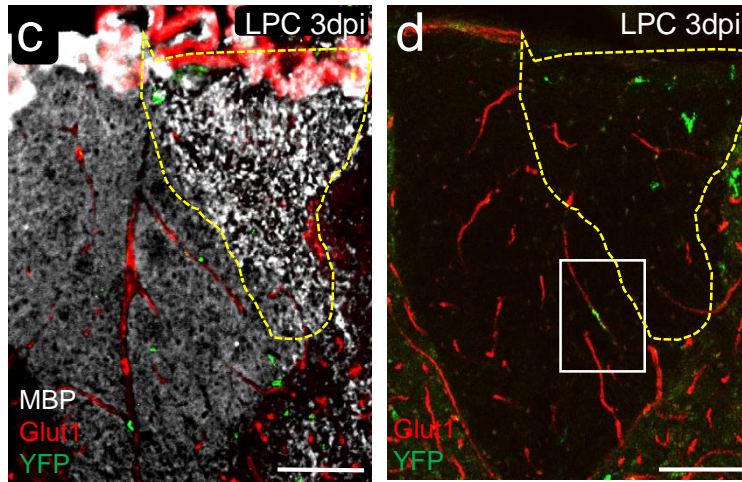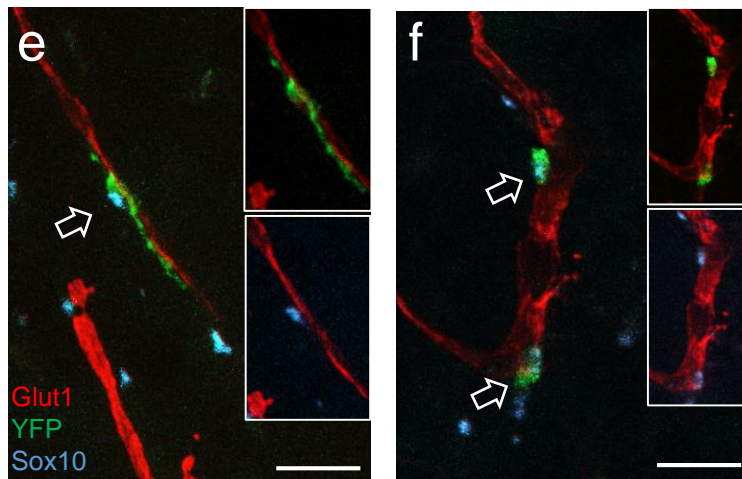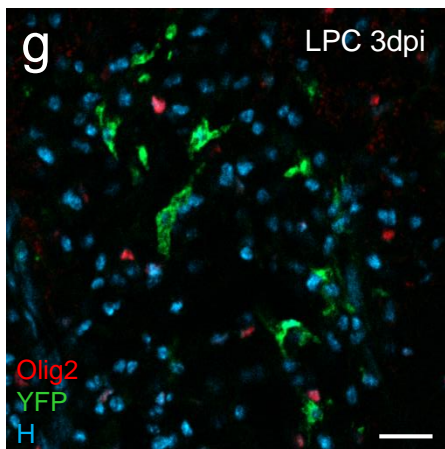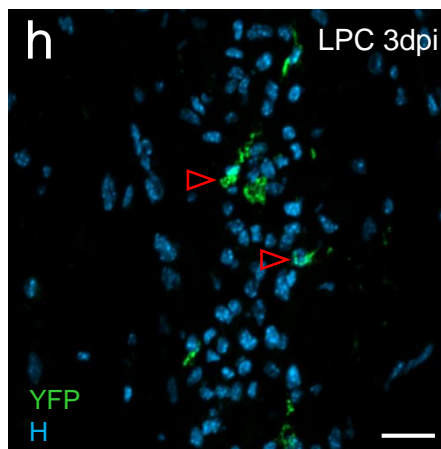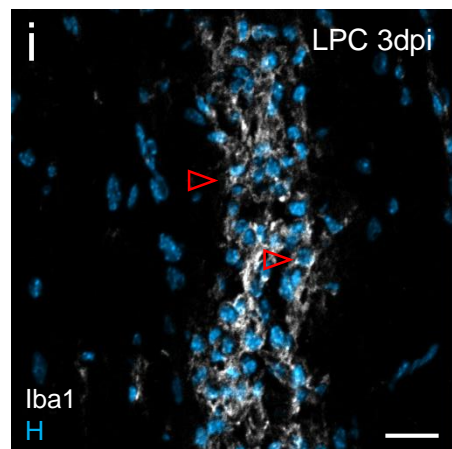

Suppl. Fig. 2

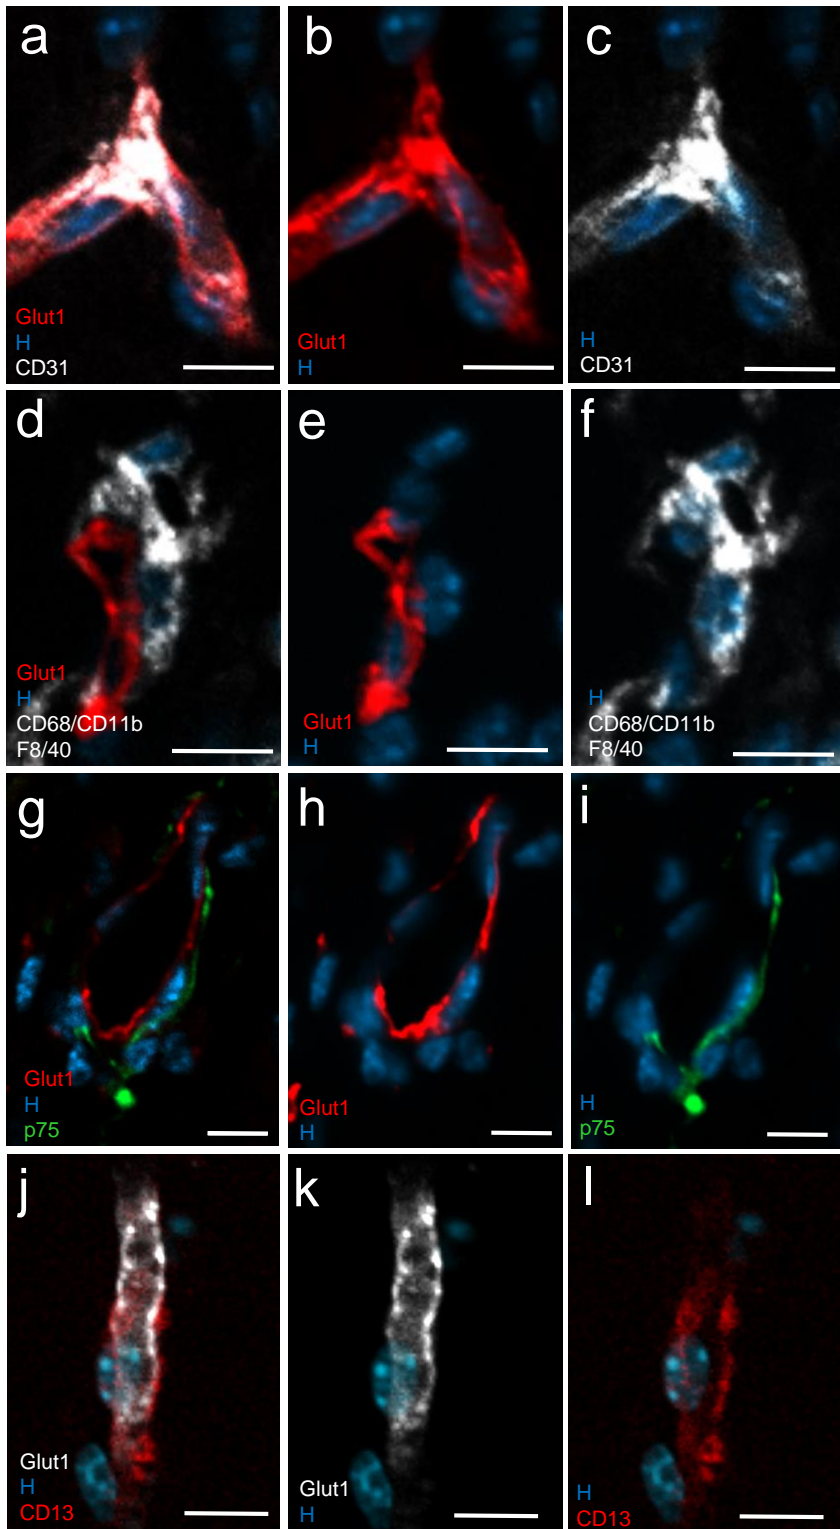

Suppl. Fig. 3

a

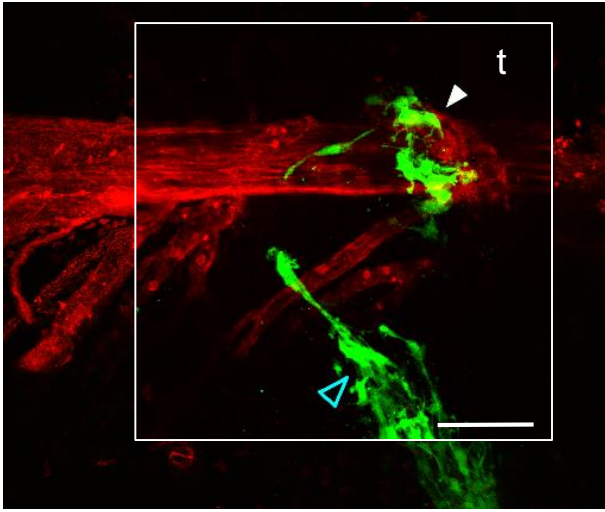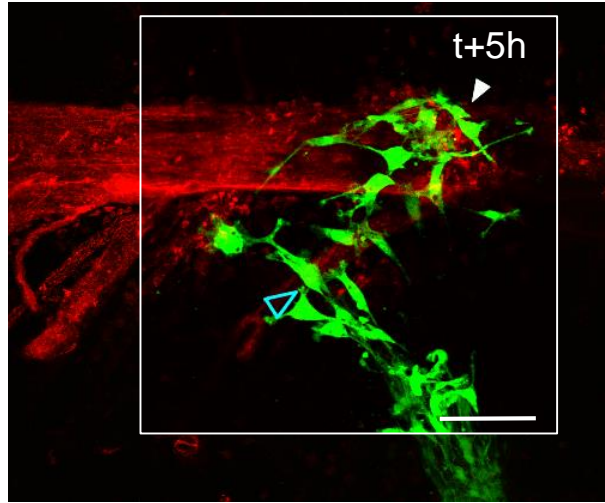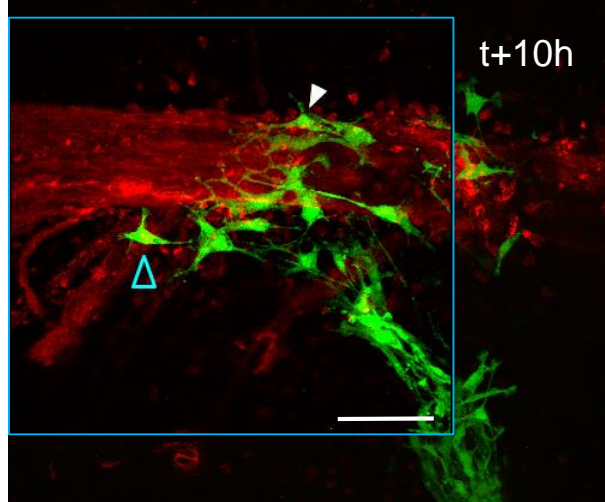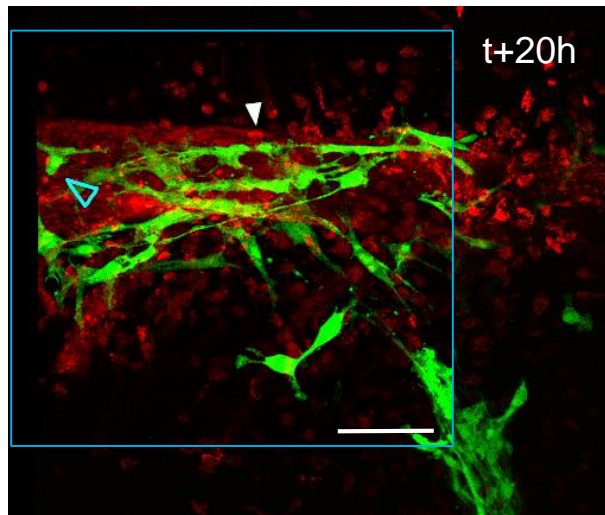

b

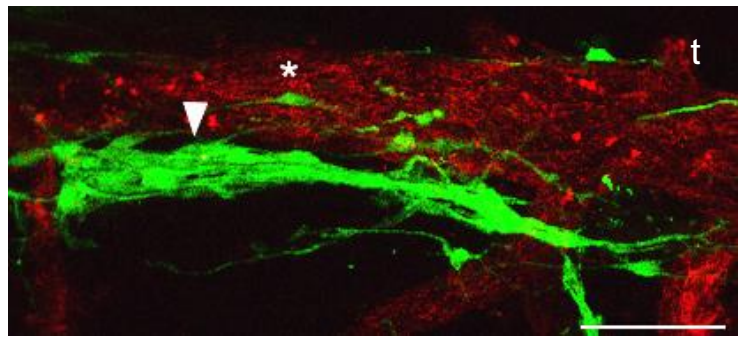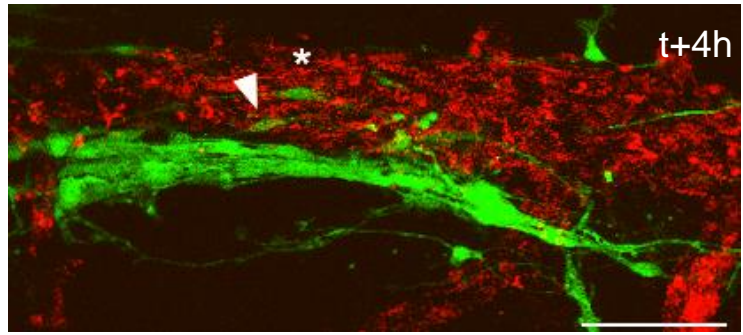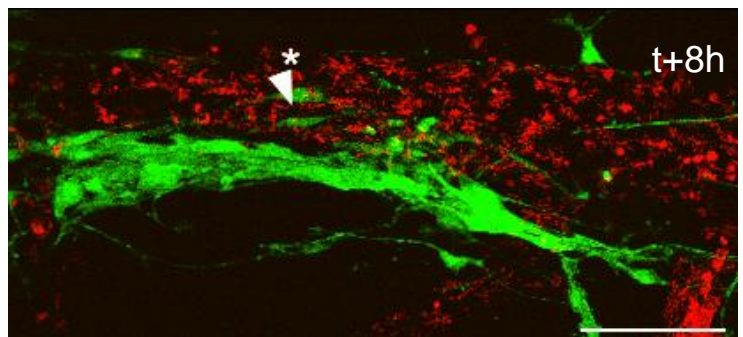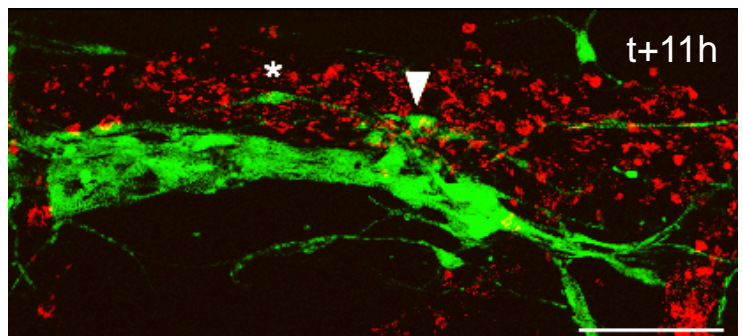

Supplement: MOESM1 [file 16667180]
